# Supplementary material
Source: ML conference proceedings conference paper supplement (https://openreview.net/forum?id=qMUbhGUFUb)
Supplement: supplementary_material [file attachment]

## Appendix

### A Reproducibility statement

To facilitate complete reproducibility and transparency of our work, we publicly release all model weights, training code, and datasets used in developing SmolVLM. Additionally, we provide a fully functional phone application showcasing real-time multimodal inference directly on-device, demonstrating practical, real-world usability on use cases such as assistive aid for low-vision users. We will provide links upon acceptance of the paper to avoid interfering with the double-blind review process.

Furthermore, we pushed our evaluation code to established open-source repositories and leaderboards (such as OpenCompass (Duan et al., 2024)), enabling easy comparison, validation, and replication by the broader research community. Wherever possible, performance metrics for comparative models cited in this paper were obtained directly from these open-source evaluation platforms. Through these comprehensive efforts, we aim to set a high standard for reproducibility and encourage continued community-driven benchmarking and innovation in efficient multimodal models.

### B Implementation Details

SmolVLM is trained in **four successive stages**:

1. **Alignment** — tune only the vision-projection MLP and LoRA adapters on 4M image-text pairs.
2. **Pre-training** — unfreeze the full model and train it to 20M high-quality images.
3. **Single-image SFT** — Training full model on 13.5M image SFT.
4. **Image & Video SFT** Training full modal on a mixture of text, image, multiimage and video

All stages use AdamW ( $\beta_1=0.9$ ,  $\beta_2=0.95$ ), linear warm-up, cosine decay, bf16, and gradient clipping at 1.0. The key hyperparameters for each stage and model size (256 M, 500 M, 2.2 B) are summarized in Table 2.

|          |                                                  | Alignment          | Pretraining                 | SFT                         |                             |
|----------|--------------------------------------------------|--------------------|-----------------------------|-----------------------------|-----------------------------|
|          |                                                  |                    |                             | Single-Image                | Image+Video                 |
| Vision   | <b>Resolution</b>                                | 512/384            | 512/384×{{1×1}, ..., {6×6}} | 512/384×{{1×1}, ..., {6×6}} | 512/384×{{1×1}, ..., {6×6}} |
|          | <b>#Tokens</b>                                   | 64/81              | Max 64/81×17                | Max 81×17                   | Max 64/81×17                |
| Data     | <b>Dataset</b>                                   | Images             | High-quality Images         | Instructional Images        | Multi-Image & Video         |
|          | <b>#Samples</b>                                  | 4M                 | 20M                         | 13.5M                       | 3M                          |
| Model    | <b>Trainable</b>                                 | MLP+LoRA (all)     | Full Model                  | Full Model                  | Full Model                  |
|          | 256M LLM                                         | ≈0.9M              | 256M                        | 256M                        | 256M                        |
|          | 500M LLM                                         | ≈1.8M              | 500M                        | 500M                        | 500M                        |
|          | 2.2B LLM                                         | ≈7.5M              | 2.2B                        | 2.2B                        | 2.2B                        |
| Training | <b>Batch Size</b>                                | 1024               | 2048                        | 8192                        | 512                         |
|          | <b>LR: <math>\psi_{\text{vision}}</math></b>     | $1 \times 10^{-4}$ | $1 \times 10^{-5}$          | $1 \times 10^{-5}$          | $5 \times 10^{-6}$          |
|          | <b>LR: <math>\{\theta_{\text{proj}}\}</math></b> | $1 \times 10^{-3}$ | $1 \times 10^{-5}$          | $1 \times 10^{-5}$          | $1 \times 10^{-4}$          |
|          | <b>LR: <math>\{\phi_{\text{LLM}}\}</math></b>    | $1 \times 10^{-3}$ | $1 \times 10^{-5}$          | $1 \times 10^{-5}$          | $2 \times 10^{-5}$          |
|          | <b>Epochs</b>                                    | 1                  | 1                           | 1                           | 1                           |

Table 2: Detailed configuration for each training stage of **SmolVLM** across three model sizes (256M, 500M, 2.2B). Stage-1 fine-tunes only lightweight MLP heads plus LoRA adapters; subsequent stages train the full network. Vision hyper-parameters reflect SmolVLM’s high-compression encoder (81 tokens per 384×384 image). Values derive from the public configs: tr\_341\_smolv1m\_025b\_1st\_stage, tr\_345\_vsmollm2\_256M\_2nd\_stage, and tr\_346\_vsmollm2\_256M\_3rd\_stage. OneVision settings mirror the single-image curriculum except for multi-image/video inputs, kept unchanged for now.

---

## C Related Work

### C.1 First-Generation Vision-Language Models

Early multimodal models achieved significant progress primarily through scaling parameters, but their substantial computational and memory requirements limited practical deployment. Flamingo (Alayrac et al., 2022b), an 80B-parameter Vision-Language Model (VLM) from DeepMind, combined a frozen 70B-parameter language model (Chinchilla (Hoffmann et al., 2022)) with a vision encoder using gated cross-attention layers and a Perceiver Resampler (Jaegle et al., 2021) to efficiently compress images and videos into fewer tokens. Flamingo demonstrated state-of-the-art few-shot capabilities without task-specific fine-tuning, though its enormous size posed severe challenges for real-world applications.

Hugging Face’s Idefics (Laurençon et al., 2023) adopted Flamingo’s architecture, offering models at both 9B and 80B parameters, further exemplifying the approach of large-scale multimodal training. In contrast, BLIP-2 (Li et al., 2023a) proposed a more parameter-efficient, modular design by freezing both the vision encoder and language model, introducing instead a lightweight Query Transformer (Q-Former) that translates visual features into language-compatible tokens. This approach significantly reduced trainable parameters, surpassing Flamingo’s performance on VQA tasks (Antol et al., 2015; Goyal et al., 2017) with roughly 54 times fewer trainable parameters, thus paving the way toward more efficient multimodal architectures.

Similarly, LLaVA (Large Language-and-Vision Assistant) (Liu et al., 2023) connected a pretrained CLIP (Radford et al., 2021) ViT image encoder to a LLaMA/Vicuna language backbone (Touvron et al., 2023; Zheng et al., 2024), fine-tuning the combined model on instruction-following datasets. Resulting in a 13B-parameter multimodal chatbot with GPT-4V-like capabilities (Achiam et al., 2023), LLaVA achieved notable visual conversational performance. However, despite being smaller and faster than Flamingo, it still demands substantial GPU memory for real-time interaction and inherits the limitations of the underlying language model’s context window (typically 2048 tokens).

Recent research has actively explored various design choices, training strategies, and data configurations to enhance Vision-Language Models (VLMs). For instance, Idefics2 (Laurençon et al., 2024) introduced architectural and training-data improvements compared to its predecessor, advancing open-source VLM capabilities. Concurrently, Cambrian1 (Tong et al., 2024) examined fundamental design principles and scaling behaviors, aiming for more efficient architectures. Projects like Eagle (Shi et al., 2024) and its successor Eagle2 (Li et al., 2025b) have optimized specific architectural components, targeting improved performance and efficiency. Additionally, recent efforts such as Apollo (Zohar et al., 2024b) extend multimodal architectures from static images to video understanding, further enriching the diversity of approaches.

### C.2 Efficiency-Focused Vision-Language Models

Larger models, such as InternVL (Chen et al., 2024c;b) and Qwen-VL (Bai et al., 2023; 2025; Wang et al., 2024), introduced architectural innovations for improved computational efficiency. InternVL aligns a 6B-parameter vision transformer (ViT) with an 8B-parameter language “middleware,” forming a 14B-parameter model that achieves state-of-the-art results across multiple vision and multimodal tasks. This balanced architecture narrows the modality gap, enabling robust multimodal perception and generation capabilities. Similarly, Qwen-VL integrates a Qwen language model with specialized visual modules, leveraging captioned bounding-box data to enhance visual grounding and text recognition capabilities. Despite its strong multilingual and multimodal performance, Qwen-VL generates exceptionally long token sequences for high-resolution inputs, increasing memory requirements.

On the smaller end, models like PaliGemma, Moondream2, and MiniCPM-V demonstrate impressive multimodal capabilities within constrained parameter budgets. PaliGemma (Team et al., 2024), with just 3B parameters (400M vision encoder from SigLIP-So (Zhai et al., 2023) and 2B Gemma language model), effectively covers a wide range of multimodal

---

tasks, though its condensed visual interface can limit detailed visual analysis. Moondream2, at merely 1.8B parameters, pairs SigLIP visual features with Microsoft’s Phi-1.5 language model (Li et al., 2023b), showcasing competitive performance on tasks such as image description, OCR, counting, and classification, ideal for edge and mobile applications. MiniCPM-V (Hu et al., 2024), specifically designed for on-device scenarios, integrates a 400M vision encoder and a 7.5B language model via a perceiver-style adapter. This compact model notably achieves GPT-4V-level performance on selected benchmarks, occasionally surpassing significantly larger models like GPT-4V and Google Gemini (Team et al., 2023).

Deepseek VL and Deepseek VL2 (Lu et al., 2024a; Wu et al., 2024b), spanning 2–7B and 4–27B parameters respectively, further illustrate the growing focus on efficient yet powerful multimodal models suitable for resource-constrained environments. Collectively, these models demonstrate the increasing feasibility of deploying effective, real-time multimodal AI in practical scenarios.

### C.3 Multimodal Tokenization and Compression Strategies

Efficient tokenization of visual data is central to reducing computational and memory demands in Vision-Language Models (VLMs). Early naive approaches, encoding every pixel or image patch as separate tokens, resulted in excessively long sequences—such as 196 tokens for a typical  $224 \times 224$  image at  $16 \times 16$  resolution—incurring substantial computational overhead. Recent methods have therefore introduced compression strategies to minimize token count while retaining critical visual information.

A prevalent approach employs learned modules like Perceiver Resamplers (Jaegle et al., 2021), as exemplified by Flamingo (Alayrac et al., 2022b), which compresses visual inputs into a small set (e.g., 64) of latent tokens. Similarly, BLIP-2’s Q-Former (Li et al., 2023a) drastically reduces visual input to approximately 32 query embeddings, substantially shortening sequence lengths with minimal impact on general performance. However, these aggressive compression strategies tend to reduce capabilities on tasks demanding fine-grained visual detail, particularly Optical Character Recognition (OCR) (Singh et al., 2019; Biten et al., 2019), motivating subsequent model refinements.

Spatial compression methods such as patch pooling or pixel shuffle have become increasingly popular. InternVL v1.5 and Idefics3 (Chen et al., 2024c;b; Laurençon et al., 2023), for example, replace learned resamplers with simple pixel-shuffle techniques, typically employing a  $2 \times 2$  compression that reduces token count by a factor of four. This approach effectively maintains sufficient spatial granularity, crucial for OCR-intensive tasks.

Other models incorporate multi-scale representations or selective token dropping. For instance, Qwen-VL-2 (Wang et al., 2024) utilizes convolutional and Transformer modules to down-sample visual hidden states, managing large images or extended video inputs effectively. Adaptive tokenization strategies, such as image tiling employed by models like UReader and DocOwl, further enhance flexibility by segmenting images into smaller sub-images encoded independently. This enables dynamic adjustment of token counts according to task complexity and input detail, albeit at the expense of global context.

Practically, models select varying compromises: Flamingo and BLIP-2 prefer fixed, minimal tokens; InternVL and Idefics balance token count and detail preservation; whereas PaliGemma and Moondream2 opt for highly compressed, single global embeddings. Benchmark analyses reveal the trade-offs clearly: excessively sparse tokens hinder detail-oriented tasks such as DocVQA (Mathew et al., 2021), while overly dense tokens exponentially raise memory demands. Surveys suggest optimal token counts around 100 or fewer, reserving higher counts specifically for detail-sensitive tasks.

### C.4 Video-Capable Vision-Language Models

Extending vision-language models (VLMs) from static images to dynamic videos introduces additional complexities due to the temporal dimension, significantly increasing token counts and computational demands. Early VLMs, such as Video-LLaVA (Lin et al., 2023a), emphasize unified training on both image and video data. By aligning video frame features

---

with static image representations, Video-LLaVA substantially enhanced performance, outperforming earlier models such as Video-ChatGPT (Maaz et al., 2023) by notable margins on benchmarks including MSRVTT (Xu et al., 2016), MSVD (Chen & Dolan, 2011), TGIF (Li et al., 2016), and ActivityNet (Caba Heilbron et al., 2015).

Recent models have introduced innovative methods to handle long-form video content more efficiently and effectively. For instance, Temporal Preference Optimization (TPO) (Li et al., 2025a) employs self-training preference learning at multiple granularities—localized and comprehensive temporal grounding—to enhance models’ ability to understand temporal contexts, significantly improving performance on benchmarks like LongVideoBench, MLVU, and Video-MME. The Oryx MLLM (Liu et al., 2024g) introduces a dynamic compressor module and the adaptable OryxViT visual encoder, which adjusts visual token compression dynamically, effectively balancing efficiency and precision across varying task requirements.

VideoLLaMA3 (Zhang et al., 2025) further pushes multimodal understanding by adapting its vision encoder to process varying image resolutions and utilizing a multi-task fine-tuning strategy to enhance video comprehension capabilities significantly. In the context of handling extensive video sequences, Video-XL (Shu et al., 2024) introduces Visual Summarization Tokens (VST) to compress visual information effectively, employing curriculum learning and dynamic compression strategies for efficient training and inference on hour-scale videos. Similarly, Kangaroo (Liu et al., 2024b) addresses long-context video inputs through a curriculum training approach, progressively scaling input resolution and frame count, achieving state-of-the-art performance across diverse benchmarks. Lastly, InternVideo2.5 (Wang et al., 2025) employs hierarchical token compression (HiCo) and task preference optimization to facilitate efficient processing of longer videos and improve specialized vision tasks such as object tracking and segmentation. Collectively, these advancements demonstrate significant progress in enabling VLMs to efficiently and effectively understand complex video content across extensive temporal scales.

Apollo (Zohar et al., 2024b) further exemplifies efficiency-oriented video modeling, using selective temporal sampling and token pooling strategies to handle hour-long videos effectively within modest parameter budgets. The Apollo family (1.5B, 3B, 7B parameters) achieves remarkable results, with Apollo-3B surpassing most existing 7B models on benchmarks like LongVideoBench, MLVU, and Video-MME (Wu et al., 2024a; Zhou et al., 2024; Fu et al., 2024).

## References

- Josh Achiam, Steven Adler, Sandhini Agarwal, Lama Ahmad, Ilge Akkaya, Florencia Leoni Aleman, Diogo Almeida, Janko Altschmidt, Sam Altman, Shyamal Anadkat, et al. Gpt-4 technical report. *arXiv preprint arXiv:2303.08774*, 2023.
- Jean-Baptiste Alayrac, Jeff Donahue, Pauline Luc, Antoine Miech, Iain Barr, Yana Hasson, Karel Lenc, Arthur Mensch, Katherine Millican, Malcolm Reynolds, Roman Ring, Eliza Rutherford, Serkan Cabi, Tengda Han, Zhitao Gong, Sina Samangooei, Marianne Monteiro, Jacob L Menick, Sebastian Borgeaud, Andy Brock, Aida Nematzadeh, Sahand Sharifzadeh, Miłkoł aj Bińkowski, Ricardo Barreira, Oriol Vinyals, Andrew Zisserman, and Karén Simonyan. Flamingo: a visual language model for few-shot learning. In S. Koyejo, S. Mohamed, A. Agarwal, D. Belgrave, K. Cho, and A. Oh (eds.), *Advances in Neural Information Processing Systems*, volume 35, pp. 23716–23736. Curran Associates, Inc., 2022a. URL [https://proceedings.neurips.cc/paper\\_files/paper/2022/file/960a172bc7fbf0177ccccbb411a7d800-Paper-Conference.pdf](https://proceedings.neurips.cc/paper_files/paper/2022/file/960a172bc7fbf0177ccccbb411a7d800-Paper-Conference.pdf).
- Jean-Baptiste Alayrac, Jeff Donahue, Pauline Luc, Antoine Miech, Iain Barr, Yana Hasson, Karel Lenc, Arthur Mensch, Katherine Millican, Malcolm Reynolds, et al. Flamingo: a visual language model for few-shot learning. *Advances in neural information processing systems*, 35:23716–23736, 2022b.
- Loubna Ben Allal, Anton Lozhkov, Elie Bakouch, Gabriel Martín Blázquez, Guilherme Penedo, Lewis Tunstall, Andrés Marafioti, Hynek Kydlíček, Agustín Piqueres Lajarín,

- 
- Vaibhav Srivastav, Joshua Lochner, Caleb Fahlgren, Xuan-Son Nguyen, Cl  mentine Fourrier, Ben Burtenshaw, Hugo Larcher, Haojun Zhao, Cyril Zakka, Mathieu Morlon, Colin Raffel, Leandro von Werra, and Thomas Wolf. Smollm2: When smol goes big – data-centric training of a small language model, 2025. URL <https://arxiv.org/abs/2502.02737>.
- Stanislaw Antol, Aishwarya Agrawal, Jiasen Lu, Margaret Mitchell, Dhruv Batra, C Lawrence Zitnick, and Devi Parikh. Vqa: Visual question answering. In *Proceedings of the IEEE international conference on computer vision*, pp. 2425–2433, 2015.
- Srikar Appalaraju, Bhavan Jasani, Bhargava Urala Kota, Yusheng Xie, and R Manmatha. Docformer: End-to-end transformer for document understanding. In *Proceedings of the IEEE/CVF international conference on computer vision*, pp. 993–1003, 2021.
- Jinze Bai, Shuai Bai, Shusheng Yang, Shijie Wang, Sinan Tan, Peng Wang, Junyang Lin, Chang Zhou, and Jingren Zhou. Qwen-vl: A versatile vision-language model for understanding, localization, text reading, and beyond. 2023.
- Shuai Bai, Keqin Chen, Xuejing Liu, Jialin Wang, Wenbin Ge, Sibong Song, Kai Dang, Peng Wang, Shijie Wang, Jun Tang, Humen Zhong, Yuanzhi Zhu, Mingkun Yang, Zhaohai Li, Jianqiang Wan, Pengfei Wang, Wei Ding, Zheren Fu, Yiheng Xu, Jiabo Ye, Xi Zhang, Tianbao Xie, Zesen Cheng, Hang Zhang, Zhibo Yang, Haiyang Xu, and Junyang Lin. Qwen2.5-vl technical report, 2025. URL <https://arxiv.org/abs/2502.13923>.
- Lucas Beyer, Andreas Steiner, Andr   Susano Pinto, Alexander Kolesnikov, Xiao Wang, Daniel Salz, Maxim Neumann, Ibrahim Alabdulmohsin, Michael Tschannen, Emanuele Bugliarello, et al. Paligemma: A versatile 3b vlm for transfer. *arXiv preprint arXiv:2407.07726*, 2024.
- Ali Furkan Biten, Rub  n Tito, Andr  s Mafla, Llu  s Gomez, Mar  al Rusi  ol, C.V. Jawahar, Ernest Valveny, and Dimosthenis Karatzas. Scene text visual question answering. In *2019 IEEE/CVF International Conference on Computer Vision (ICCV)*, pp. 4290–4300, 2019. doi: 10.1109/ICCV.2019.00439.
- Fabian Caba Heilbron, Victor Escorcia, Bernard Ghanem, and Juan Carlos Niebles. Activitytynet: A large-scale video benchmark for human activity understanding. In *Proceedings of the IEEE conference on computer vision and pattern recognition*, pp. 961–970, 2015.
- David Chen and Bill Dolan. Collecting highly parallel data for paraphrase evaluation. Association for Computational Linguistics, January 2011. URL <https://www.microsoft.com/en-us/research/publication/collecting-highly-parallel-data-for-paraphrase-evaluation/>.
- Lin Chen, Jisong Li, Xiaoyi Dong, Pan Zhang, Conghui He, Jiaqi Wang, Feng Zhao, and Dahua Lin. Sharegpt4v: Improving large multi-modal models with better captions. *arXiv preprint arXiv:2311.12793*, 2023.
- Lin Chen, Jinsong Li, Xiaoyi Dong, Pan Zhang, Yuhang Zang, Zehui Chen, Haodong Duan, Jiaqi Wang, Yu Qiao, Dahua Lin, et al. Are we on the right way for evaluating large vision-language models? *arXiv preprint arXiv:2403.20330*, 2024a.
- Zhe Chen, Weiyun Wang, Yue Cao, Yangzhou Liu, Zhangwei Gao, Erfei Cui, Jinguo Zhu, Shenglong Ye, Hao Tian, Zhaoyang Liu, et al. Expanding performance boundaries of open-source multimodal models with model, data, and test-time scaling. *arXiv preprint arXiv:2412.05271*, 2024b.
- Zhe Chen, Weiyun Wang, Hao Tian, Shenglong Ye, Zhangwei Gao, Erfei Cui, Wenwen Tong, Kongzhi Hu, Jiapeng Luo, Zheng Ma, et al. How far are we to gpt-4v? closing the gap to commercial multimodal models with open-source suites. *arXiv preprint arXiv:2404.16821*, 2024c.
- DeepSeek-AI. Deepseek-r1: Incentivizing reasoning capability in llms via reinforcement learning, 2025. URL <https://arxiv.org/abs/2501.12948>.



- 
- Matt Deitke, Christopher Clark, Sangho Lee, Rohun Tripathi, Yue Yang, Jae Sung Park, Mohammadreza Salehi, Niklas Muennighoff, Kyle Lo, Luca Soldaini, Jiasen Lu, Taira Anderson, Erin Bransom, Kiana Ehsani, Huong Ngo, YenSung Chen, Ajay Patel, Mark Yatskar, Chris Callison-Burch, Andrew Head, Rose Hendrix, Favyen Bastani, Eli VanderBilt, Nathan Lambert, Yvonne Chou, Arnavi Chheda, Jenna Sparks, Sam Skjonsberg, Michael Schmitz, Aaron Sarnat, Byron Bischoff, Pete Walsh, Chris Newell, Piper Wolters, Tanmay Gupta, Kuo-Hao Zeng, Jon Borchardt, Dirk Groeneveld, Crystal Nam, Sophie Lebrecht, Caitlin Wittliff, Carissa Schoenick, Oscar Michel, Ranjay Krishna, Luca Weihs, Noah A. Smith, Hannaneh Hajishirzi, Ross Girshick, Ali Farhadi, and Aniruddha Kembhavi. Molmo and pixmo: Open weights and open data for state-of-the-art vision-language models, 2024. URL <https://arxiv.org/abs/2409.17146>.
- Haodong Duan, Junming Yang, Yuxuan Qiao, Xinyu Fang, Lin Chen, Yuan Liu, Xiaoyi Dong, Yuhang Zang, Pan Zhang, Jiaqi Wang, et al. Vlmevalkit: An open-source toolkit for evaluating large multi-modality models. *arXiv preprint arXiv:2407.11691*, 2024.
- Abhimanyu Dubey, Abhinav Jauhri, Abhinav Pandey, Abhishek Kadian, Ahmad Al-Dahle, Aiesha Letman, Akhil Mathur, Alan Schelten, Amy Yang, Angela Fan, et al. The llama 3 herd of models. *arXiv preprint arXiv:2407.21783*, 2024.
- Miquel Farré, Andi Marafioti, Lewis Tunstall, Leandro Von Werra, and Thomas Wolf. Finevideo. <https://huggingface.co/datasets/HuggingFaceFV/finevideo>, 2024.
- Manuel Faysse, Hugues Sibille, Tony Wu, Bilel Omrani, Gautier Viaud, Céline Hudelot, and Pierre Colombo. Colpali: Efficient document retrieval with vision language models. *arXiv preprint arXiv:2407.01449*, 2024.
- Chaoyou Fu, Yuhan Dai, Yondong Luo, Lei Li, Shuhuai Ren, Renrui Zhang, Zihan Wang, Chenyu Zhou, Yunhang Shen, Mengdan Zhang, et al. Video-mme: The first-ever comprehensive evaluation benchmark of multi-modal llms in video analysis. *arXiv preprint arXiv:2405.21075*, 2024.
- Shaikat Galib, Shanshan Wang, Guanshuo Xu, Pascal Pfeiffer, Ryan Chesler, Mark Landry, and Sri Satish Ambati. H2ovl-mississippi vision language models technical report, 2024. URL <https://arxiv.org/abs/2410.13611>.
- Philippe Gervais, Asya Fadeeva, and Andrii Maksai. Mathwriting: A dataset for handwritten mathematical expression recognition, 2024. URL <https://arxiv.org/abs/2404.10690>.
- Yash Goyal, Tejas Khot, Douglas Summers-Stay, Dhruv Batra, and Devi Parikh. Making the v in vqa matter: Elevating the role of image understanding in visual question answering. In *Proceedings of the IEEE conference on computer vision and pattern recognition*, pp. 6904–6913, 2017.
- Jarvis Guo, Tuney Zheng, Yuelin Bai, Bo Li, Yubo Wang, King Zhu, Yizhi Li, Graham Neubig, Wenhui Chen, and Xiang Yue. Mammoth-vl: Eliciting multimodal reasoning with instruction tuning at scale. 2024. URL <https://arxiv.org/abs/2412.05237>.
- Jordan Hoffmann, Sebastian Borgeaud, Arthur Mensch, Elena Buchatskaya, Trevor Cai, Eliza Rutherford, Diego de Las Casas, Lisa Anne Hendricks, Johannes Welbl, Aidan Clark, et al. Training compute-optimal large language models. *arXiv preprint arXiv:2203.15556*, 2022.
- Jack Hong, Shilin Yan, Jiayin Cai, Xiaolong Jiang, Yao Hu, and Weidi Xie. Worldsense: Evaluating real-world omnimodal understanding for multimodal llms, 2025. URL <https://arxiv.org/abs/2502.04326>.
- Shengding Hu, Yuge Tu, Xu Han, Chaoqun He, Ganqu Cui, Xiang Long, Zhi Zheng, Yewei Fang, Yuxiang Huang, Weilin Zhao, Xinrong Zhang, Zheng Leng Thai, Kaihuo Zhang, Chongyi Wang, Yuan Yao, Chenyang Zhao, Jie Zhou, Jie Cai, Zhongwu Zhai, Ning Ding, Chao Jia, Guoyang Zeng, Dahai Li, Zhiyuan Liu, and Maosong Sun. Minicpm: Unveiling the potential of small language models with scalable training strategies, 2024. URL <https://arxiv.org/abs/2404.06395>.

- 
- Andrew Jaegle, Felix Gimeno, Andy Brock, Oriol Vinyals, Andrew Zisserman, and Joao Carreira. Perceiver: General perception with iterative attention. In Marina Meila and Tong Zhang (eds.), *Proceedings of the 38th International Conference on Machine Learning*, volume 139 of *Proceedings of Machine Learning Research*, pp. 4651–4664. PMLR, 18–24 Jul 2021. URL <https://proceedings.mlr.press/v139/jaegle21a.html>.
- Aniruddha Kembhavi, Mike Salvato, Eric Kolve, Minjoon Seo, Hannaneh Hajishirzi, and Ali Farhadi. A diagram is worth a dozen images. In Bastian Leibe, Jiri Matas, Nicu Sebe, and Max Welling (eds.), *Computer Vision – ECCV 2016*, pp. 235–251, Cham, 2016. Springer International Publishing. ISBN 978-3-319-46493-0.
- Denis Kocetkov, Raymond Li, Loubna Ben Allal, Jia Li, Chenghao Mou, Carlos Muñoz Ferrandis, Yacine Jernite, Margaret Mitchell, Sean Hughes, Thomas Wolf, et al. The stack: 3 tb of permissively licensed source code. *arXiv preprint arXiv:2211.15533*, 2022.
- Jing Yu Koh, Ruslan Salakhutdinov, and Daniel Fried. Grounding language models to images for multimodal inputs and outputs, 2023.
- Vik Korrapati. Moondream. Online, 2024. URL <https://moondream.ai/>. Accessed: 2025-03-27.
- Hugo Laurençon, Lucile Saulnier, Leo Tronchon, Stas Bekman, Amanpreet Singh, Anton Lozhkov, Thomas Wang, Siddharth Karamcheti, Alexander M Rush, Douwe Kiela, Matthieu Cord, and Victor Sanh. OBELICS: An open web-scale filtered dataset of interleaved image-text documents. In *Thirty-seventh Conference on Neural Information Processing Systems Datasets and Benchmarks Track*, 2023. URL <https://openreview.net/forum?id=SKN2hf1BIZ>.
- Hugo Laurençon, Léo Tronchon, Matthieu Cord, and Victor Sanh. What matters when building vision-language models? *arXiv preprint arXiv:2405.02246*, 2024.
- Hugo Laurençon, Andrés Marafioti, Victor Sanh, and Léo Tronchon. Building and better understanding vision-language models: insights and future directions, 2024. URL <https://arxiv.org/abs/2408.12637>.
- Jeffrey Li, Alex Fang, Georgios Smyrnis, Maor Ivgi, Matt Jordan, Samir Gadre, Hritik Bansal, Etash Guha, Sedrick Keh, Kushal Arora, et al. Datacomp-LM: In search of the next generation of training sets for language models. *arXiv preprint arXiv:2406.11794*, 2024a.
- Junnan Li, Dongxu Li, Silvio Savarese, and Steven Hoi. Blip-2: bootstrapping language-image pre-training with frozen image encoders and large language models. In *Proceedings of the 40th International Conference on Machine Learning, ICML’23*. JMLR.org, 2023a.
- Kunchang Li, Yali Wang, Yanan He, Yizhuo Li, Yi Wang, Yi Liu, Zun Wang, Jilan Xu, Guo Chen, Ping Luo, Limin Wang, and Yu Qiao. Mvbench: A comprehensive multi-modal video understanding benchmark. In *Proceedings of the IEEE/CVF Conference on Computer Vision and Pattern Recognition (CVPR)*, pp. 22195–22206, June 2024b.
- Rui Li, Xiaohan Wang, Yuhui Zhang, Zeyu Wang, and Serena Yeung-Levy. Temporal preference optimization for long-form video understanding. *arXiv preprint arXiv:2501.13919*, 2025a.
- Yuanzhi Li, Sébastien Bubeck, Ronen Eldan, Allie Del Giorno, Suriya Gunasekar, and Yin Tat Lee. Textbooks are all you need ii: phi-1.5 technical report. *arXiv preprint arXiv:2309.05463*, 2023b.
- Yuncheng Li, Yale Song, Liangliang Cao, Joel Tetreault, Larry Goldberg, Alejandro Jaimes, and Jiebo Luo. Tgif: A new dataset and benchmark on animated gif description. In *Proceedings of the IEEE Conference on Computer Vision and Pattern Recognition*, pp. 4641–4650, 2016.

- 
- Zhiqi Li, Guo Chen, Shilong Liu, Shihao Wang, Vibashan VS, Yishen Ji, Shiyi Lan, Hao Zhang, Yilin Zhao, Subhashree Radhakrishnan, et al. Eagle 2: Building post-training data strategies from scratch for frontier vision-language models. *arXiv preprint arXiv:2501.14818*, 2025b.
- Bin Lin, Yang Ye, Bin Zhu, Jiayi Cui, Munan Ning, Peng Jin, and Li Yuan. Video-llava: Learning united visual representation by alignment before projection. *arXiv preprint arXiv:2311.10122*, 2023a.
- Ziyi Lin, Chris Liu, Renrui Zhang, Peng Gao, Longtian Qiu, Han Xiao, Han Qiu, Chen Lin, Wenqi Shao, Keqin Chen, et al. Sphinx: The joint mixing of weights, tasks, and visual embeddings for multi-modal large language models. *arXiv preprint arXiv:2311.07575*, 2023b.
- Haotian Liu, Chunyuan Li, Qingyang Wu, and Yong Jae Lee. Visual instruction tuning. In *Thirty-seventh Conference on Neural Information Processing Systems*, 2023. URL <https://openreview.net/forum?id=w0H2xGH1kw>.
- Haotian Liu, Chunyuan Li, Yuheng Li, Bo Li, Yuanhan Zhang, Sheng Shen, and Yong Jae Lee. Llava-next: Improved reasoning, ocr, and world knowledge, January 2024a. URL <https://llava-vl.github.io/blog/2024-01-30-llava-next/>.
- Jiajun Liu, Yibing Wang, Hanghang Ma, Xiaoping Wu, Xiaoqi Ma, Xiaoming Wei, Jianbin Jiao, Enhua Wu, and Jie Hu. Kangaroo: A powerful video-language model supporting long-context video input. *arXiv preprint arXiv:2408.15542*, 2024b.
- Xiaoran Liu, Hang Yan, Shuo Zhang, Chenxin An, Xipeng Qiu, and Dahua Lin. Scaling laws of rope-based extrapolation, 2024c. URL <https://arxiv.org/abs/2310.05209>.
- Yuanxin Liu, Shicheng Li, Yi Liu, Yuxiang Wang, Shuhuai Ren, Lei Li, Sishuo Chen, Xu Sun, and Lu Hou. Tempcompass: Do video llms really understand videos?, 2024d. URL <https://arxiv.org/abs/2403.00476>.
- Yuliang Liu, Zhang Li, Mingxin Huang, Biao Yang, Wenwen Yu, Chunyuan Li, Xu-Cheng Yin, Cheng-Lin Liu, Lianwen Jin, and Xiang Bai. Ocrbench: on the hidden mystery of ocr in large multimodal models. *Science China Information Sciences*, 67(12):220102, 2024e.
- Zhijian Liu, Ligeng Zhu, Baifeng Shi, Zhuoyang Zhang, Yuming Lou, Shang Yang, Haocheng Xi, Shiyi Cao, Yuxian Gu, Dacheng Li, et al. Nvila: Efficient frontier visual language models. *arXiv preprint arXiv:2412.04468*, 2024f.
- Zuyan Liu, Yuhao Dong, Ziwei Liu, Winston Hu, Jiwen Lu, and Yongming Rao. Oryx mllm: On-demand spatial-temporal understanding at arbitrary resolution. *arXiv preprint arXiv:2409.12961*, 2024g.
- Nikolaos Livathinos, Christoph Auer, Maksym Lysak, Ahmed Nassar, Michele Dolfi, Panos Vagenas, Cesar Berrospi Ramis, Matteo Omenetti, Kasper Dinkla, Yusik Kim, et al. Docling: An efficient open-source toolkit for ai-driven document conversion. In *AAAI 25: Workshop on Open-Source AI for Mainstream Use*, 2025.
- Haoyu Lu, Wen Liu, Bo Zhang, Bingxuan Wang, Kai Dong, Bo Liu, Jingxiang Sun, Tongzheng Ren, Zhuoshu Li, Yaofeng Sun, et al. Deepseek-vl: towards real-world vision-language understanding. *arXiv preprint arXiv:2403.05525*, 2024a.
- Pan Lu, Swaroop Mishra, Tanglin Xia, Liang Qiu, Kai-Wei Chang, Song-Chun Zhu, Oyvind Tafjord, Peter Clark, and Ashwin Kalyan. Learn to explain: Multimodal reasoning via thought chains for science question answering. In S. Koyejo, S. Mohamed, A. Agarwal, D. Belgrave, K. Cho, and A. Oh (eds.), *Advances in Neural Information Processing Systems*, volume 35, pp. 2507–2521. Curran Associates, Inc., 2022. URL [https://proceedings.neurips.cc/paper\\_files/paper/2022/file/11332b6b6cf4485b84afadb1352d3a9a-Paper-Conference.pdf](https://proceedings.neurips.cc/paper_files/paper/2022/file/11332b6b6cf4485b84afadb1352d3a9a-Paper-Conference.pdf).



- 
- Pan Lu, Hritik Bansal, Tony Xia, Jiacheng Liu, Chunyuan Li, Hannaneh Hajishirzi, Hao Cheng, Kai-Wei Chang, Michel Galley, and Jianfeng Gao. Mathvista: Evaluating mathematical reasoning of foundation models in visual contexts. In *International Conference on Learning Representations (ICLR)*, 2024b.
- Muhammad Maaz, Hanoona Rasheed, Salman Khan, and Fahad Shahbaz Khan. Videochatgpt: Towards detailed video understanding via large vision and language models. *arXiv preprint arXiv:2306.05424*, 2023.
- Ahmed Masry, Do Long, Jia Qing Tan, Shafiq Joty, and Enamul Hoque. ChartQA: A benchmark for question answering about charts with visual and logical reasoning. In *Findings of the Association for Computational Linguistics: ACL 2022*, pp. 2263–2279, Dublin, Ireland, May 2022. Association for Computational Linguistics. doi: 10.18653/v1/2022.findings-acl.177. URL <https://aclanthology.org/2022.findings-acl.177>.
- Minesh Mathew, Dimosthenis Karatzas, and C. V. Jawahar. Docvqa: A dataset for vqa on document images. In *2021 IEEE Winter Conference on Applications of Computer Vision (WACV)*, pp. 2199–2208, 2021. doi: 10.1109/WACV48630.2021.00225.
- Brandon McKinzie, Zhe Gan, Jean-Philippe Fauconnier Biard, Sam Dodge, Philipp Dufter, Bowen Zhang, Dhruti Shah, Xianzhi Du, Futang Peng, Haotian Zhang, Floris Weers, Anton Belyi, Karanjeet Singh, Doug Kang, Ankur Jain, Hongyu He, Max Schwarzer, Tom Gunter, Xiang Kong, Aonan Zhang, Jianyu Wang, Chong Wang, Nan Du, Tao Lei, Sam Wiseman, Mark Lee, Zirui Wang, Ruoming Pang, Peter Gräsch, Alexander Toshev, and Yinfei Yang. Mm1: Methods, analysis & insights from multimodal llm pre-training, 2024. URL <https://arxiv.org/abs/2403.09611>.
- Ahmed Nassar, Andres Marafioti, Matteo Omenetti, Maksym Lysak, Nikolaos Livathinos, Christoph Auer, Lucas Morin, Rafael Teixeira de Lima, Yusik Kim, A. Said Gurbuz, Michele Dolfi, Miquel Farré, and Peter W. J. Staar. Smoldocling: An ultra-compact vision-language model for end-to-end multi-modal document conversion, 2025. URL <https://arxiv.org/abs/2503.11576>.
- OpenAI, :, Aaron Jaech, Adam Kalai, Adam Lerer, Adam Richardson, Ahmed El-Kishky, Aiden Low, Alec Helyar, Aleksander Madry, Alex Beutel, Alex Carney, Alex Iftimie, Alex Karpenko, Alex Tachard Passos, Alexander Neitz, Alexander Prokofiev, Alexander Wei, Allison Tam, Ally Bennett, Ananya Kumar, Andre Saraiva, Andrea Vallone, Andrew Duberstein, Andrew Kondrich, Andrey Mishchenko, Andy Applebaum, Angela Jiang, Ashvin Nair, Barret Zoph, Behrooz Ghorbani, Ben Rossen, Benjamin Sokolowsky, Boaz Barak, Bob McGrew, Borys Minaiev, Botao Hao, Bowen Baker, Brandon Houghton, Brandon McKinzie, Brydon Eastman, Camillo Lugaresi, Cary Bassin, Cary Hudson, Chak Ming Li, Charles de Bourcy, Chelsea Voss, Chen Shen, Chong Zhang, Chris Koch, Chris Orsinger, Christopher Hesse, Claudia Fischer, Clive Chan, Dan Roberts, Daniel Kappler, Daniel Levy, Daniel Selsam, David Dohan, David Farhi, David Mely, David Robinson, Dimitris Tsipras, Doug Li, Dragos Oprica, Eben Freeman, Eddie Zhang, Edmund Wong, Elizabeth Proehl, Enoch Cheung, Eric Mitchell, Eric Wallace, Erik Ritter, Evan Mays, Fan Wang, Felipe Petroski Such, Filippo Raso, Florencia Leoni, Foivos Tsimpourlas, Francis Song, Fred von Lohmann, Freddie Sulit, Geoff Salmon, Giambattista Parascandolo, Gildas Chabot, Grace Zhao, Greg Brockman, Guillaume Leclerc, Hadi Salman, Haiming Bao, Hao Sheng, Hart Andrin, Hessam Bagherinezhad, Hongyu Ren, Hunter Lightman, Hyung Won Chung, Ian Kivlichan, Ian O’Connell, Ian Osband, Ignasi Clavera Gilaberte, Ilge Akkaya, Ilya Kostrikov, Ilya Sutskever, Irina Kofman, Jakub Pachocki, James Lennon, Jason Wei, Jean Harb, Jerry Twore, Jiacheng Feng, Jiahui Yu, Jiayi Weng, Jie Tang, Jieqi Yu, Joaquin Quiñero Candela, Joe Palermo, Joel Parish, Johannes Heidecke, John Hallman, John Rizzo, Jonathan Gordon, Jonathan Uesato, Jonathan Ward, Joost Huizinga, Julie Wang, Kai Chen, Kai Xiao, Karan Singhal, Karina Nguyen, Karl Cobbe, Katy Shi, Kayla Wood, Kendra Rimbach, Keren Gu-Lemberg, Kevin Liu, Kevin Lu, Kevin Stone, Kevin Yu, Lama Ahmad, Lauren Yang, Leo Liu, Leon Maksin, Leyton Ho, Liam Fedus, Lilian Weng, Linden Li, Lindsay McCallum, Lindsey Held, Lorenz Kuhn, Lukas Kondraciuk, Lukasz Kaiser, Luke Metz, Madelaine Boyd, Maja Trebacz, Manas Joglekar, Mark Chen, Marko

- 
- Tintor, Mason Meyer, Matt Jones, Matt Kaufer, Max Schwarzer, Meghan Shah, Mehmet Yatbaz, Melody Y. Guan, Mengyuan Xu, Mengyuan Yan, Mia Glaese, Mianna Chen, Michael Lampe, Michael Malek, Michele Wang, Michelle Fradin, Mike McClay, Mikhail Pavlov, Miles Wang, Mingxuan Wang, Mira Murati, Mo Bavarian, Mostafa Rohaninejad, Nat McAleese, Neil Chowdhury, Neil Chowdhury, Nick Ryder, Nikolas Tezak, Noam Brown, Ofir Nachum, Oleg Boiko, Oleg Murk, Olivia Watkins, Patrick Chao, Paul Ashbourne, Pavel Izmailov, Peter Zhokhov, Rachel Dias, Rahul Arora, Randall Lin, Rapha Gontijo Lopes, Raz Gaon, Reah Miyara, Reimar Leike, Renny Hwang, Rhythm Garg, Robin Brown, Roshan James, Rui Shu, Ryan Cheu, Ryan Greene, Saachi Jain, Sam Altman, Sam Toizer, Sam Toyer, Samuel Miserendino, Sandhini Agarwal, Santiago Hernandez, Sasha Baker, Scott McKinney, Scottie Yan, Shengjia Zhao, Shengli Hu, Shibani Santurkar, Shraman Ray Chaudhuri, Shuyuan Zhang, Siyuan Fu, Spencer Papay, Steph Lin, Suchir Balaji, Suvansh Sanjeev, Szymon Sidor, Tal Broda, Aidan Clark, Tao Wang, Taylor Gordon, Ted Sanders, Tejal Patwardhan, Thibault Sottiaux, Thomas Degry, Thomas Dimson, Tianhao Zheng, Timur Garipov, Tom Stasi, Trapit Bansal, Trevor Creech, Troy Peterson, Tyna Eloundou, Valerie Qi, Vineet Kosaraju, Vinnie Monaco, Vitchyr Pong, Vlad Fomenko, Weiye Zheng, Wenda Zhou, Wes McCabe, Wojciech Zaremba, Yann Dubois, Yinghai Lu, Yining Chen, Young Cha, Yu Bai, Yuchen He, Yuchen Zhang, Yunyun Wang, Zheng Shao, and Zhuohan Li. Openai o1 system card, 2024. URL <https://arxiv.org/abs/2412.16720>.
- Guilherme Penedo, Quentin Malartic, Daniel Hesslow, Ruxandra Cojocaru, Hamza Alobeidli, Alessandro Cappelli, Baptiste Pannier, Ebtesam Almazrouei, and Julien Launay. The RefinedWeb dataset for Falcon LLM: Outperforming curated corpora with web data only. In *Advances in Neural Information Processing Systems*, 2024.
- Alec Radford, Jong Wook Kim, Chris Hallacy, Aditya Ramesh, Gabriel Goh, Sandhini Agarwal, Girish Sastry, Amanda Askell, Pamela Mishkin, Jack Clark, Gretchen Krueger, and Ilya Sutskever. Learning transferable visual models from natural language supervision. In *International Conference on Machine Learning*, 2021.
- Weiming Ren, Huan Yang, Jie Min, Cong Wei, and Wenhui Chen. Vista: Enhancing long-duration and high-resolution video understanding by video spatiotemporal augmentation, 2024. URL <https://arxiv.org/abs/2412.00927>.
- Min Shi, Fuxiao Liu, Shihao Wang, Shijia Liao, Subhashree Radhakrishnan, De-An Huang, Hongxu Yin, Karan Sapra, Yaser Yacoub, Humphrey Shi, et al. Eagle: Exploring the design space for multimodal llms with mixture of encoders. *arXiv preprint arXiv:2408.15998*, 2024.
- Wenzhe Shi, Jose Caballero, Ferenc Huszár, Johannes Totz, Andrew P. Aitken, Rob Bishop, Daniel Rueckert, and Zehan Wang. Real-time single image and video super-resolution using an efficient sub-pixel convolutional neural network, 2016. URL <https://arxiv.org/abs/1609.05158>.
- Yan Shu, Zheng Liu, Peitian Zhang, Minghao Qin, Junjie Zhou, Zhengyang Liang, Tiejun Huang, and Bo Zhao. Video-xl: Extra-long vision language model for hour-scale video understanding. *arXiv preprint arXiv:2409.14485*, 2024.
- Amanpreet Singh, Vivek Natarajan, Meet Shah, Yu Jiang, Xinlei Chen, Devi Parikh, and Marcus Rohrbach. Towards vqa models that can read. In *Proceedings of the IEEE Conference on Computer Vision and Pattern Recognition*, pp. 8317–8326, 2019.
- Luca Soldaini, Rodney Kinney, Akshita Bhagia, Dustin Schwenk, David Atkinson, Russell Authur, Ben Bogin, Khyathi Chandu, Jennifer Dumas, Yanai Elazar, Valentin Hofmann, Ananya Harsh Jha, Sachin Kumar, Li Lucy, Xinxin Lyu, Nathan Lambert, Ian Magnusson, Jacob Morrison, Niklas Muennighoff, Aakanksha Naik, Crystal Nam, Matthew E. Peters, Abhilasha Ravichander, Kyle Richardson, Zejiang Shen, Emma Strubell, Nishant Subramani, Oyvind Tafjord, Pete Walsh, Luke Zettlemoyer, Noah A. Smith, Hannaneh Hajishirzi, Iz Beltagy, Dirk Groeneveld, Jesse Dodge, and Kyle Lo. Dolma: an open corpus of three trillion tokens for language model pretraining research, 2024.
- Enxin Song, Wenhao Chai, Guanhong Wang, Yucheng Zhang, Haoyang Zhou, Feiyang Wu, Haozhe Chi, Xun Guo, Tian Ye, Yanting Zhang, Yan Lu, Jenq-Neng Hwang, and Gaoang

- 
- Wang. Moviechat: From dense token to sparse memory for long video understanding, 2024. URL <https://arxiv.org/abs/2307.16449>.
- Andreas Steiner, André Susano Pinto, Michael Tschannen, Daniel Keysers, Xiao Wang, Yonatan Bitton, Alexey Gritsenko, Matthias Minderer, Anthony Sherbondy, Shangbang Long, Siyang Qin, Reeve Ingle, Emanuele Bugliarello, Sahar Kazemzadeh, Thomas Mesnard, Ibrahim Alabdulmohsin, Lucas Beyer, and Xiaohua Zhai. Paligemma 2: A family of versatile vlms for transfer, 2024. URL <https://arxiv.org/abs/2412.03555>.
- Gemini Team, Rohan Anil, Sebastian Borgeaud, Yonghui Wu, Jean-Baptiste Alayrac, Jiahui Yu, Radu Soricut, Johan Schalkwyk, Andrew M Dai, Anja Hauth, et al. Gemini: a family of highly capable multimodal models. *arXiv preprint arXiv:2312.11805*, 2023.
- Gemma Team, Morgane Riviere, Shreya Pathak, Pier Giuseppe Sessa, Cassidy Hardin, Surya Bhupatiraju, Léonard Hussenot, Thomas Mesnard, Bobak Shahriari, Alexandre Ramé, et al. Gemma 2: Improving open language models at a practical size, 2024. URL <https://arxiv.org/abs/2408.00118>, 1(3), 2024.
- Peter Tong, Ellis Brown, Penghao Wu, Sanghyun Woo, Adithya Jairam Vedagiri IYER, Sai Charitha Akula, Shusheng Yang, Jihan Yang, Manoj Middepogu, Ziteng Wang, et al. Cambrian-1: A fully open, vision-centric exploration of multimodal llms. *Advances in Neural Information Processing Systems*, 37:87310–87356, 2024.
- Hugo Touvron, Thibaut Lavril, Gautier Izacard, Xavier Martinet, Marie-Anne Lachaux, Timothée Lacroix, Baptiste Rozière, Naman Goyal, Eric Hambro, Faisal Azhar, Aurelien Rodriguez, Armand Joulin, Edouard Grave, and Guillaume Lample. Llama: Open and efficient foundation language models, 2023.
- Peng Wang, Shuai Bai, Sinan Tan, Shijie Wang, Zhihao Fan, Jinze Bai, Keqin Chen, Xuejing Liu, Jialin Wang, Wenbin Ge, et al. Qwen2-vl: Enhancing vision-language model’s perception of the world at any resolution. *arXiv preprint arXiv:2409.12191*, 2024.
- Yi Wang, Xinhao Li, Ziang Yan, Yinan He, Jiashuo Yu, Xiangyu Zeng, Chenting Wang, Changlian Ma, Haian Huang, Jianfei Gao, et al. Internvideo2. 5: Empowering video mllms with long and rich context modeling. *arXiv preprint arXiv:2501.12386*, 2025.
- Haoning Wu, Dongxu Li, Bei Chen, and Junnan Li. Longvideobench: A benchmark for long-context interleaved video-language understanding. *Advances in Neural Information Processing Systems*, 37:28828–28857, 2024a.
- Zhiyu Wu, Xiaokang Chen, Zizheng Pan, Xingchao Liu, Wen Liu, Damai Dai, Huazuo Gao, Yiyang Ma, Chengyue Wu, Bingxuan Wang, Zhenda Xie, Yu Wu, Kai Hu, Jiawei Wang, Yaofeng Sun, Yukun Li, Yishi Piao, Kang Guan, Aixin Liu, Xin Xie, Yuxiang You, Kai Dong, Xingkai Yu, Haowei Zhang, Liang Zhao, Yisong Wang, and Chong Ruan. Deepseek-vl2: Mixture-of-experts vision-language models for advanced multimodal understanding, 2024b. URL <https://arxiv.org/abs/2412.10302>.
- Jun Xu, Tao Mei, Ting Yao, and Yong Rui. Msr-vtt: A large video description dataset for bridging video and language. In *Proceedings of the IEEE conference on computer vision and pattern recognition*, pp. 5288–5296, 2016.
- Zhangchen Xu, Fengqing Jiang, Luyao Niu, Yuntian Deng, Radha Poovendran, Yejin Choi, and Bill Yuchen Lin. Magpie: Alignment data synthesis from scratch by prompting aligned llms with nothing. *arXiv preprint arXiv:2406.08464*, 2024.
- Dongjie Yang, Suyuan Huang, Chengqiang Lu, Xiaodong Han, Haoxin Zhang, Yan Gao, Yao Hu, and Hai Zhao. Vript: A video is worth thousands of words, 2024. URL <https://arxiv.org/abs/2406.06040>.
- Yuan Yao, Tianyu Yu, Ao Zhang, Chongyi Wang, Junbo Cui, Hongji Zhu, Tianchi Cai, Haoyu Li, Weilin Zhao, Zhihui He, Qianyu Chen, Huarong Zhou, Zhensheng Zou, Haoye Zhang, Shengding Hu, Zhi Zheng, Jie Zhou, Jie Cai, Xu Han, Guoyang Zeng, Dahai Li, Zhiyuan Liu, and Maosong Sun. Minicpm-v: A gpt-4v level mllm on your phone, 2024. URL <https://arxiv.org/abs/2408.01800>.

- 
- Jiabo Ye, Anwen Hu, Haiyang Xu, Qinghao Ye, Ming Yan, Guohai Xu, Chenliang Li, Junfeng Tian, Qi Qian, Ji Zhang, et al. Ureader: Universal ocr-free visually-situated language understanding with multimodal large language model. *arXiv preprint arXiv:2310.05126*, 2023.
- Xiang Yue, Yuansheng Ni, Kai Zhang, Tianyu Zheng, Ruoqi Liu, Ge Zhang, Samuel Stevens, Dongfu Jiang, Weiming Ren, Yuxuan Sun, Cong Wei, Botao Yu, Ruibin Yuan, Renliang Sun, Ming Yin, Boyuan Zheng, Zhenzhu Yang, Yibo Liu, Wenhao Huang, Huan Sun, Yu Su, and Wenhui Chen. Mmmu: A massive multi-discipline multimodal understanding and reasoning benchmark for expert agi. In *Proceedings of CVPR*, 2024a.
- Xiang Yue, Xingwei Qu, Ge Zhang, Yao Fu, Wenhao Huang, Huan Sun, Yu Su, and Wenhui Chen. Mammoth: Building math generalist models through hybrid instruction tuning, 2023. URL <https://arxiv.org/abs/2309.05653>, 2024b.
- Xiaohua Zhai, Basil Mustafa, Alexander Kolesnikov, and Lucas Beyer. Sigmoid loss for language image pre-training. In *Proceedings of the IEEE/CVF International Conference on Computer Vision*, pp. 11975–11986, 2023.
- Boqiang Zhang, Kehan Li, Zesen Cheng, Zhiqiang Hu, Yuqian Yuan, Guanzheng Chen, Sicong Leng, Yuming Jiang, Hang Zhang, Xin Li, et al. Videollama 3: Frontier multimodal foundation models for image and video understanding. *arXiv preprint arXiv:2501.13106*, 2025.
- Yuanhan Zhang, Jinming Wu, Wei Li, Bo Li, Zejun Ma, Ziwei Liu, and Chunyuan Li. Video instruction tuning with synthetic data, 2024. URL <https://arxiv.org/abs/2410.02713>.
- Lianmin Zheng, Wei-Lin Chiang, Ying Sheng, Siyuan Zhuang, Zhanghao Wu, Yonghao Zhuang, Zi Lin, Zhuohan Li, Dacheng Li, Eric Xing, et al. Judging llm-as-a-judge with mt-bench and chatbot arena. *Advances in Neural Information Processing Systems*, 36, 2024.
- Junjie Zhou, Yan Shu, Bo Zhao, Boya Wu, Shitao Xiao, Xi Yang, Yongping Xiong, Bo Zhang, Tiejun Huang, and Zheng Liu. Mlvu: A comprehensive benchmark for multi-task long video understanding. *arXiv preprint arXiv:2406.04264*, 2024.
- Orr Zohar, Xiaohan Wang, Yonatan Bitton, Idan Szpektor, and Serena Yeung-Levy. Video-star: Self-training enables video instruction tuning with any supervision, 2024a. URL <https://arxiv.org/abs/2407.06189>.
- Orr Zohar, Xiaohan Wang, Yann Dubois, Nikhil Mehta, Tong Xiao, Philippe Hansen-Estruch, Licheng Yu, Xiaofang Wang, Felix Juefei-Xu, Ning Zhang, et al. Apollo: An exploration of video understanding in large multimodal models. *arXiv preprint arXiv:2412.10360*, 2024b.
